# Supplementary material
Source: Springer Nature journal article supplement (https://www.springermedizin.de/resource/supplementary/12984_2011_397_MOESM4_ESM.pdf/9605856)

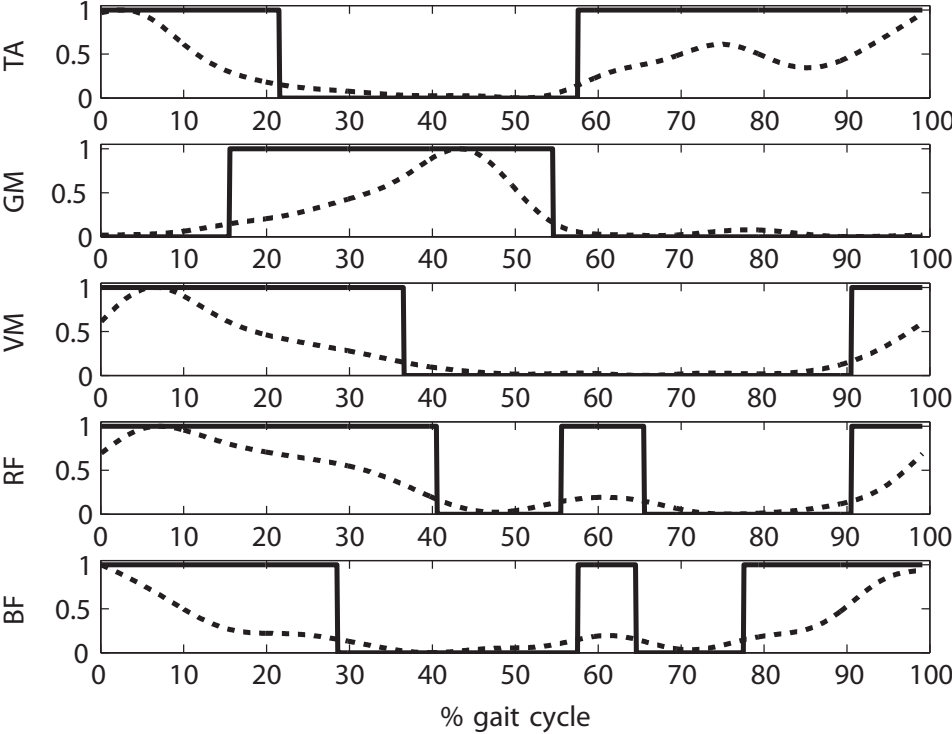

Supplement: MOESM4 [file 9605856]
